# Supplementary material for: Making a humanities town: knowledge-infused clusters, civic entrepreneurship and civil society in local innovation systems
Source: Springer Nature journal article supplement (doi:10.1186/s40604-014-0012-z), 2014-12-31
Supplement: MOESM1 [file 11901840]

## Abstract in Arabic

### Making a Humanities Town: Knowledge-infused Clusters, Civic Entrepreneurship and Civil Society in Local Innovation Systems

Henry Etzkowitz

من اجل بناء مدينة العلوم الإنسانية : التجمعات المبنية على المعرفة ،المشاريع المدنية والمجتمع المدني في انظمة الابتكار المحلي

#### ملخص

تعتبر التجمعات المبنية على المعرفة والتي تشمل الجامعة والحكومة والمؤسسة ميثالا للاستراتيجيات الاقتصادية التنموية المعاصرة. يعتبر الدور الذي لعبته جامعة جنوب ولاية أوريغون في التأسيس لمهرجان شكسبير أوريغونل نموذجاً للجامعات التي تركز على التعليم لتلعب دوراً هاماً في التنمية الاقتصادية المحلية من خلال إنشاء تجمعات ثقافية وذلك بالاعتماد على المعارف المتوفرة.

نظراً الى ان للفنون توفر منطلقاً للتجمعات المبنية على المعرفة،شأنها في ذلك شأن العلوم،نعتبر ان جميع الجامعات لديها القدرة على الإسهام في التنمية الاقتصادية والاجتماعية. قد تعتبر النظرية التقليدية للجامعات المقاوله ان الاعتماد على البحوث هو شرط اساسي لتحقيق الفوائد المرجوة. ولكن اذا قمنا بتوسيع مفهوم المقاوله ليشمل مختلف أشكال تنظيم الأعمال التجارية، والاجتماعية والثقافية والمدنية،يمكن للجامعة ان تكون مصدراً للنشاط الاقتصادي الجديد. يمكن للتقارب بين مجال المقاوله،المراوح الثلاثة، التجمعات وشبكات "المجتمع المدني والمتوفر في حالة آسلاوند، ان يقدم نموذجاً للباحثين على نظرية عامة وعملية للابتكار الإقليمي.يمكن المجتمع المدني النشط الذي يوفر ارضية خصبة للتفاعلات بين مجال المقاوله والمراوح الثلاثة من التأكيد على مفهوم التجمعات .
